# Supplementary material
Source: PubMed Central journal article supplement (PMC3777246)
Supplement: NIHMS493036-supplement-1.pdf [file NIHMS493036-supplement-1.pdf]

**Online Resource 1: Characteristics of Patients Diagnosed with a Primary CNS Tumor (SEER 9 Registries, 1973-2009)**

| Cohort Characteristics   |        | Patients, No. (%) |                |                |                 |                |            |                |                |                |            |
|--------------------------|--------|-------------------|----------------|----------------|-----------------|----------------|------------|----------------|----------------|----------------|------------|
|                          |        | PA                | A II/III       | A NOS          | GBM             | O II/III       | Ependymoma | Mixed Glioma   | Glioma NOS     | MPNET          | Meningioma |
| Total Number of Patients |        | 1,636             | 3,890          | 7,244          | 19,367          | 3,064          | 1,047      | 1,133          | 1,203          | 1,827          | 748        |
| Age at Diagnosis (years) | 0-19   | 1168<br>(71.4)    | 411<br>(10.6)  | 1090<br>(15)   | 313<br>(1.6)    | 251<br>(8.2)   | 510 (48.7) | 119<br>(10.5)  | 239<br>(19.9)  | 1338<br>(73.2) | 17 (2.3)   |
|                          | 20-44  | 359<br>(21.9)     | 1483<br>(38.1) | 2191<br>(30.2) | 2311<br>(11.9)  | 1526<br>(49.8) | 286 (27.3) | 591<br>(52.2)  | 300<br>(24.9)  | 399<br>(21.8)  | 113 (15.1) |
|                          | 45-64  | 86<br>(5.3)       | 1189<br>(30.6) | 2223<br>(30.7) | 8779<br>(45.3)  | 993<br>(32.4)  | 196 (18.7) | 324<br>(28.6)  | 368<br>(30.6)  | 77 (4.2)       | 293 (39.2) |
|                          | 65+    | 23<br>(1.4)       | 807<br>(20.7)  | 1740<br>(24)   | 7964<br>(41.1)  | 294<br>(9.6)   | 55 (5.3)   | 99 (8.7)       | 296<br>(24.6)  | 13 (0.7)       | 325 (43.4) |
| Gender                   | Male   | 830<br>(50.7)     | 2209<br>(56.8) | 4072<br>(56.2) | 11322<br>(58.5) | 1767<br>(57.7) | 583 (55.7) | 632<br>(55.8)  | 692<br>(57.5)  | 1118<br>(61.2) | 324 (43.3) |
|                          | Female | 806<br>(49.3)     | 1681<br>(43.2) | 3172<br>(43.8) | 8045<br>(41.5)  | 1297<br>(42.3) | 464 (44.3) | 501<br>(44.2)  | 511<br>(42.5)  | 709<br>(38.8)  | 424 (56.7) |
| Race                     | White  | 1388<br>(84.8)    | 3489<br>(89.7) | 6503<br>(89.8) | 17791<br>(91.9) | 2739<br>(89.4) | 879 (84)   | 1014<br>(89.5) | 1031<br>(85.7) | 1508<br>(82.5) | 586 (78.3) |

|                    |                           |         |         |        |        |        |            |          |          |           |            |
|--------------------|---------------------------|---------|---------|--------|--------|--------|------------|----------|----------|-----------|------------|
|                    | Black                     |         | 207     | 464    | 904    | 133    |            | 123      |          |           |            |
|                    |                           | 147 (9) | (5.3)   | (6.4)  | (4.7)  | (4.3)  | 102 (9.7)  | 60 (5.3) | (10.2)   | 166 (9.1) | 96 (12.8)  |
|                    | Other <sup>d</sup>        | 101     |         | 277    | 672    | 192    |            |          |          |           |            |
|                    |                           | (6.2)   | 194 (5) | (3.8)  | (3.5)  | (6.3)  | 66 (6.3)   | 59 (5.2) | 49 (4.1) | 153 (8.4) | 66 (8.8)   |
| Radiation Status   | Refused/No Radiation      | 1341    | 907     | 2281   | 4545   | 1347   |            | 355      | 467      | 378       |            |
|                    |                           | (83.1)  | (23.8)  | (32.4) | (24)   | (45)   | 380 (37.3) | (32.2)   | (39.7)   | (21.1)    | 456 (61.6) |
|                    | Radiation                 | 273     | 2907    | 4765   | 14401  | 1648   |            | 749      | 710      | 1414      |            |
|                    |                           | (16.9)  | (76.2)  | (67.6) | (76)   | (55)   | 638 (62.7) | (67.8)   | (60.3)   | (78.9)    | 284 (38.4) |
| Primary Tumor Site | Cerebral meninges (C70.0) | 0 (0)   | 0 (0)   | 0 (0)  | 0 (0)  | 0 (0)  | 0 (0)      | 0 (0)    | 0 (0)    | 0 (0)     | 633 (84.6) |
|                    | Spinal meninges (C70.1)   | 0 (0)   | 0 (0)   | 0 (0)  | 0 (0)  | 0 (0)  | 0 (0)      | 0 (0)    | 0 (0)    | 0 (0)     | 21 (2.8)   |
|                    | Meninges, NOS (C70.9)     | 0 (0)   | 0 (0)   | 0 (0)  | 0 (0)  | 0 (0)  | 0 (0)      | 0 (0)    | 0 (0)    | 0 (0)     | 77 (10.3)  |
|                    | Cerebrum (C71.0)          | 166     | 307     | 491    | 847    | 79     |            |          |          |           |            |
|                    |                           | (10.1)  | (7.9)   | (6.8)  | (4.4)  | (2.6)  | 32 (3.1)   | 46 (4.1) | 108 (9)  | 30 (1.6)  | 0 (0)      |
|                    | Frontal lobe (C71.1)      | 72      | 1094    | 1665   | 4671   | 1424   |            |          |          |           |            |
|                    |                           | (4.4)   | (28.1)  | (23)   | (24.1) | (46.5) | 65 (6.2)   | 476 (42) | 229 (19) | 53 (2.9)  | 0 (0)      |
|                    | Temporal lobe (C71.2)     | 107     | 755     | 1270   | 4438   | 583    |            | 222      |          |           |            |
|                    |                           | (6.5)   | (19.4)  | (17.5) | (22.9) | (19)   | 42 (4)     | (19.6)   | 192 (16) | 32 (1.8)  | 0 (0)      |

|               |                                        |               |               |                |                |               |            |               |               |                |            |
|---------------|----------------------------------------|---------------|---------------|----------------|----------------|---------------|------------|---------------|---------------|----------------|------------|
|               | Parietal lobe (C71.3)                  | 38<br>(2.3)   | 505<br>(13)   | 904<br>(12.5)  | 3390<br>(17.5) | 337<br>(11)   | 54 (5.2)   | 133<br>(11.7) | 121<br>(10.1) | 31 (1.7)       | 0 (0)      |
|               | Occipital lobe<br>(C71.4)              | 23<br>(1.4)   | 87<br>(2.2)   | 179<br>(2.5)   | 795<br>(4.1)   | 55<br>(1.8)   | 21 (2)     | 18 (1.6)      | 33 (2.7)      | 6 (0.3)        | 0 (0)      |
|               | Ventricle, NOS<br>(C71.5)              | 105<br>(6.4)  | 62<br>(1.6)   | 115<br>(1.6)   | 94 (0.5)       | 51<br>(1.7)   | 193 (18.4) | 14 (1.2)      | 22 (1.8)      | 62 (3.4)       | 0 (0)      |
|               | Cerebellum, NOS<br>(C71.6)             | 599<br>(36.6) | 108<br>(2.8)  | 456<br>(6.3)   | 127<br>(0.7)   | 26<br>(0.8)   | 94 (9)     | 14 (1.2)      | 25 (2.1)      | 1348<br>(73.8) | 0 (0)      |
|               | Brain stem (C71.7)                     | 200<br>(12.2) | 137<br>(3.5)  | 283<br>(3.9)   | 124<br>(0.6)   | 15<br>(0.5)   | 293 (28)   | 14 (1.2)      | 165<br>(13.7) | 100 (5.5)      | 0 (0)      |
|               | Overlapping lesion<br>of brain (C71.8) | 77<br>(4.7)   | 622<br>(16)   | 1234<br>(17)   | 3566<br>(18.4) | 378<br>(12.3) | 72 (6.9)   | 153<br>(13.5) | 168 (14)      | 51 (2.8)       | 0 (0)      |
|               | Brain, NOS (C71.9)                     | 249<br>(15.2) | 213<br>(5.5)  | 647<br>(8.9)   | 1315<br>(6.8)  | 116<br>(3.8)  | 181 (17.3) | 43 (3.8)      | 140<br>(11.6) | 114 (6.2)      | 17 (2.3)   |
| SEER          | San Francisco-<br>Oakland SMSA         | 223<br>(13.6) | 776<br>(19.9) | 844<br>(11.7)  | 3174<br>(16.4) | 417<br>(13.6) | 164 (15.7) | 175<br>(15.4) | 132 (11)      | 266<br>(14.6)  | 150 (20.1) |
| Location Site | Connecticut                            | 209<br>(12.8) | 548<br>(14.1) | 851<br>(11.7)  | 3439<br>(17.8) | 429<br>(14)   | 182 (17.4) | 139<br>(12.3) | 216 (18)      | 213<br>(11.7)  | 107 (14.3) |
|               | Detroit<br>(Metropolitan)              | 213<br>(13)   | 568<br>(14.6) | 1701<br>(23.5) | 2970<br>(15.3) | 475<br>(15.5) | 159 (15.2) | 203<br>(17.9) | 240 (20)      | 308<br>(16.9)  | 184 (24.6) |

|                   |                        |               |                |                |                |                |            |               |               |               |            |
|-------------------|------------------------|---------------|----------------|----------------|----------------|----------------|------------|---------------|---------------|---------------|------------|
|                   | Hawaii                 | 69<br>(4.2)   | 130<br>(3.3)   | 270<br>(3.7)   | 503<br>(2.6)   | 80<br>(2.6)    | 35 (3.3)   | 41 (3.6)      | 25 (2.1)      | 95 (5.2)      | 33 (4.4)   |
|                   | Iowa                   | 239<br>(14.6) | 556<br>(14.3)  | 1054<br>(14.5) | 2750<br>(14.2) | 331<br>(10.8)  | 117 (11.2) | 151<br>(13.3) | 127<br>(10.6) | 208<br>(11.4) | 67 (9)     |
|                   | New Mexico             | 86<br>(5.3)   | 184<br>(4.7)   | 418<br>(5.8)   | 928<br>(4.8)   | 203<br>(6.6)   | 59 (5.6)   | 27 (2.4)      | 63 (5.2)      | 112 (6.1)     | 53 (7.1)   |
|                   | Seattle (Puget Sound)  | 248<br>(15.2) | 463<br>(11.9)  | 940<br>(13)    | 3078<br>(15.9) | 634<br>(20.7)  | 149 (14.2) | 235<br>(20.7) | 191<br>(15.9) | 277<br>(15.2) | 75 (10)    |
|                   | Utah                   | 193<br>(11.8) | 306<br>(7.9)   | 536<br>(7.4)   | 1169 (6)       | 287<br>(9.4)   | 92 (8.8)   | 102 (9)       | 85 (7.1)      | 198<br>(10.8) | 26 (3.5)   |
|                   | Atlanta (Metropolitan) | 156<br>(9.5)  | 359<br>(9.2)   | 630<br>(8.7)   | 1356 (7)       | 208<br>(6.8)   | 90 (8.6)   | 60 (5.3)      | 124<br>(10.3) | 150 (8.2)     | 53 (7.1)   |
| Year of Diagnosis | 1973-1979              | 53<br>(3.2)   | 254<br>(6.5)   | 1589<br>(21.9) | 2658<br>(13.7) | 188<br>(6.1)   | 145 (13.8) | 51 (4.5)      | 184<br>(15.3) | 264<br>(14.4) | 109 (14.6) |
|                   | 1980-1989              | 212<br>(13)   | 990<br>(25.4)  | 3304<br>(45.6) | 4076<br>(21)   | 453<br>(14.8)  | 249 (23.8) | 265<br>(23.4) | 312<br>(25.9) | 404<br>(22.1) | 182 (24.3) |
|                   | 1990-1999              | 567<br>(34.7) | 1396<br>(35.9) | 1528<br>(21.1) | 5782<br>(29.9) | 1156<br>(37.7) | 297 (28.4) | 348<br>(30.7) | 341<br>(28.3) | 580<br>(31.7) | 234 (31.3) |
|                   | 2000-2009              | 804<br>(49.1) | 1250<br>(32.1) | 823<br>(11.4)  | 6851<br>(35.4) | 1267<br>(41.4) | 356 (34)   | 469<br>(41.4) | 366<br>(30.4) | 579<br>(31.7) | 223 (29.8) |

|           |                       |                |                |                |                 |                |            |                |                |                |            |
|-----------|-----------------------|----------------|----------------|----------------|-----------------|----------------|------------|----------------|----------------|----------------|------------|
| Ethnicity | Non-Hispanic          | 1497<br>(91.7) | 3692<br>(95.1) | 6972<br>(96.4) | 18582<br>(96.1) | 2886<br>(94.3) | 958 (91.7) | 1076<br>(95.4) | 1144<br>(95.3) | 1635<br>(89.7) | 701 (94.2) |
|           | Hispanic <sup>b</sup> | 136<br>(8.3)   | 191<br>(4.9)   | 261<br>(3.6)   | 748<br>(3.9)    | 173<br>(5.7)   | 87 (8.3)   | 52 (4.6)       | 57 (4.7)       | 188<br>(10.3)  | 43 (5.8)   |

Abbreviations: O, Observed; O/E, Observed/expected; SEER, Surveillance, Epidemiology and End Results; PA, Pilocytic Astrocytoma; A NOS, Astrocytoma Not Otherwise Specified; A II/III, Astrocytoma Grade II and III; GBM, Glioblastoma Multiforme; O II/III, Oligodendroglioma Grade II and III; M/PNET, Medulloblastoma/Primitive Neuroectodermal Tumor

<sup>a</sup>American Indian/AK Native, Asian/Pacific Islander

<sup>b</sup>Mexican including Chicano, Puerto Rican, Cuban, South or Central American excluding Brazil, Other spec. Span/Hisp. Origin including Europe excluding Dom. Rep., Spanish/Hispanic/Latino NOS, Spanish surname only, Dominican Republic
